# Supplementary figures and images for: DAPK interacts with Patronin and the microtubule cytoskeleton in epidermal development and wound repair
Source: eLife journal article supplement (doi:10.7554/elife.15833), 2016-09-23

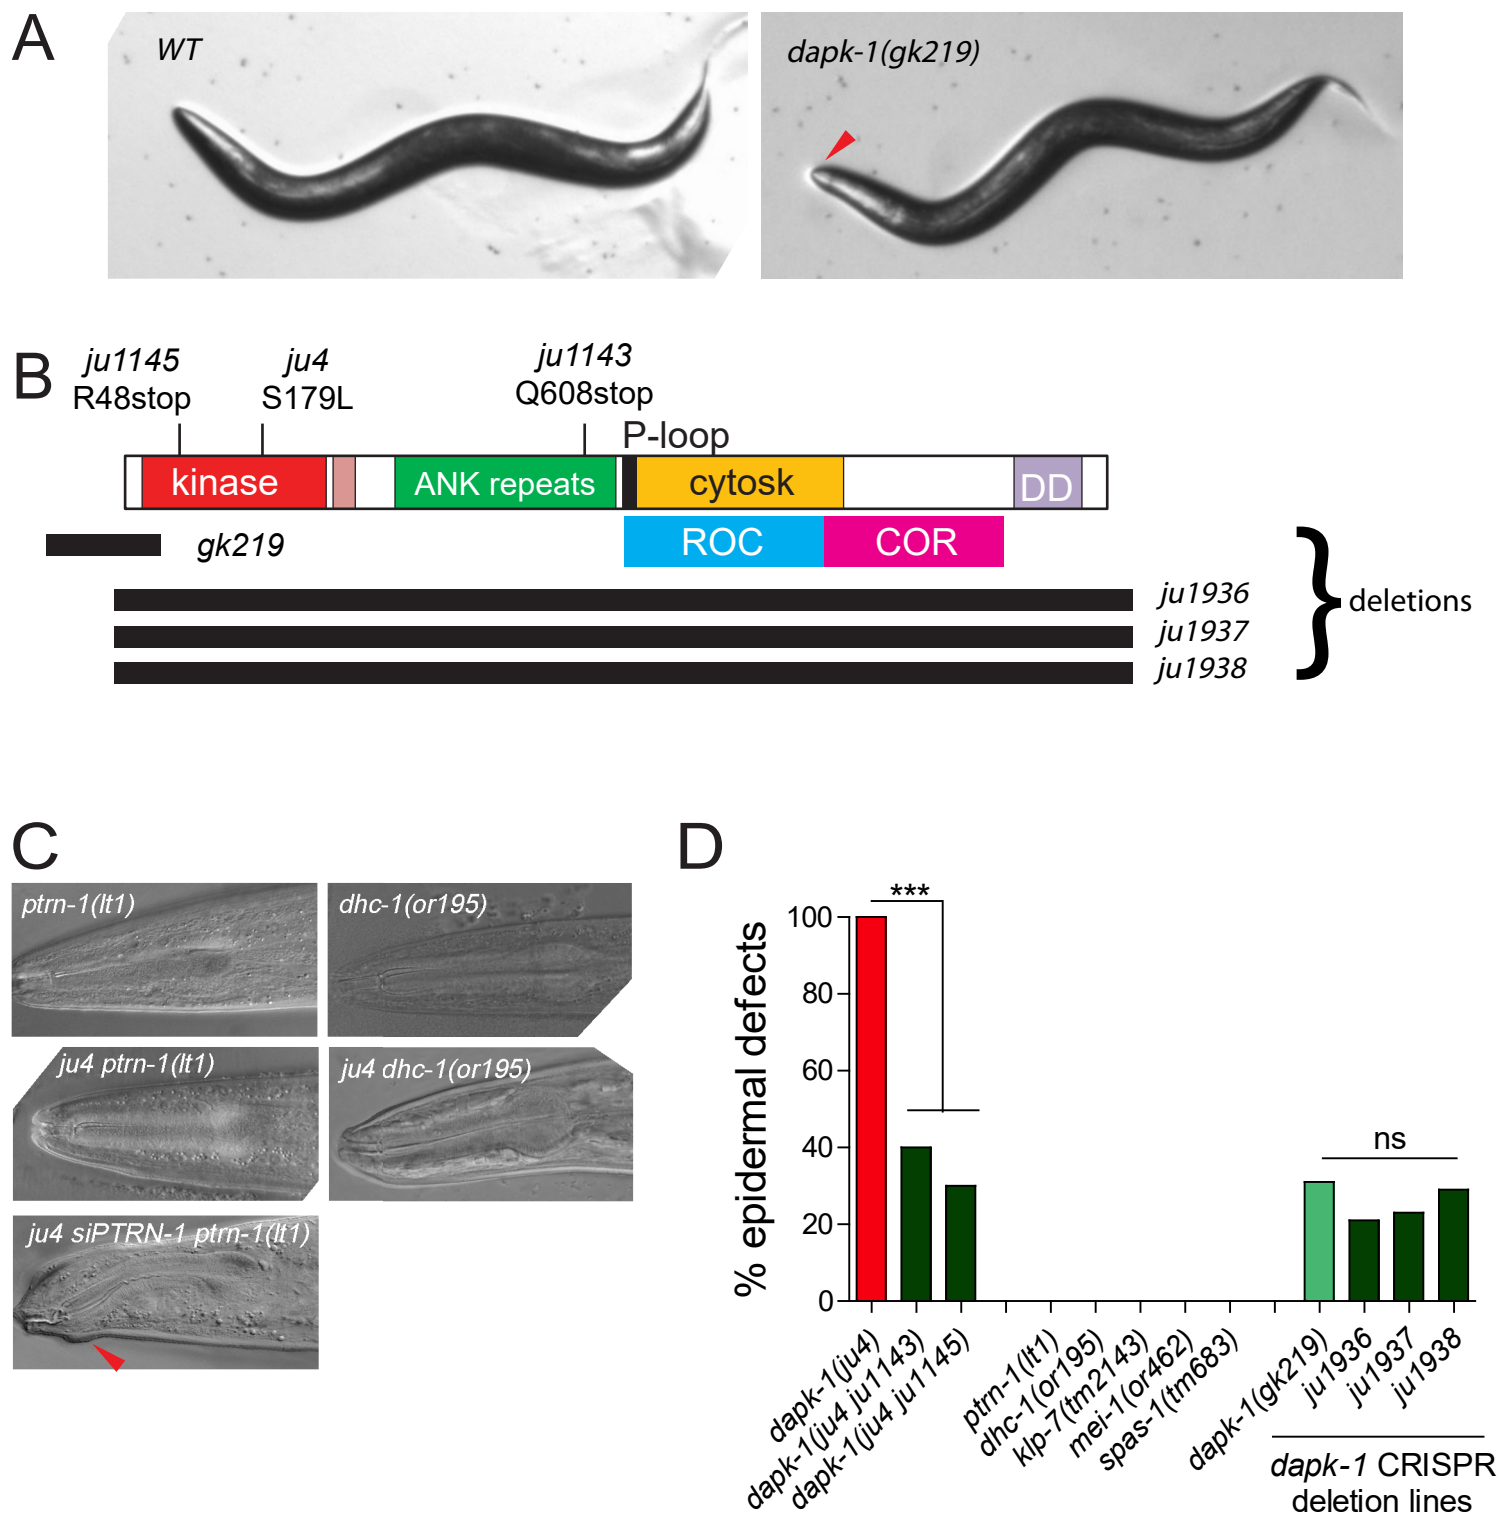

Figure 1--figure supplement 1

Supplement: supp [file elife_poa_e15833_Figure_1_figure_Supplement_1.pdf › elife_poa_e15833_Figure_1_figure_Supplement_1.pdf]

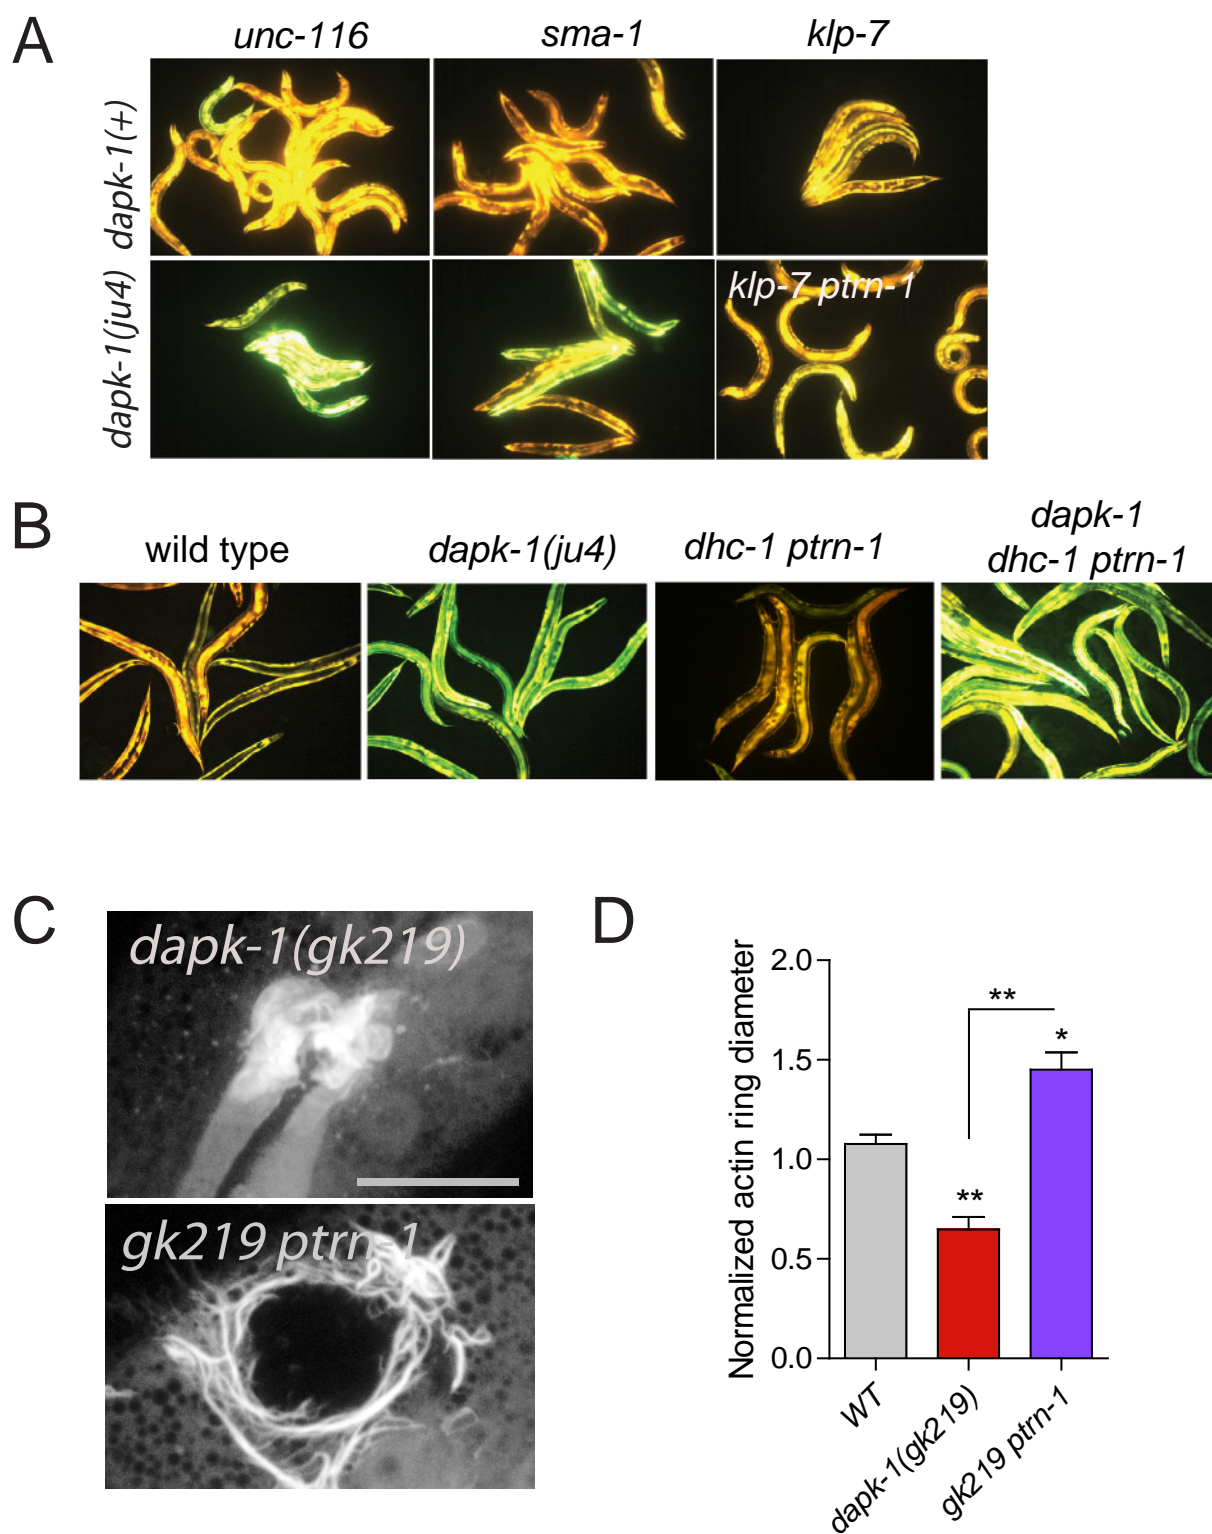

Figure 2-figure supplement 1

Supplement: supp [file elife_poa_e15833_Figure_2_figure_Supplement_1.pdf › elife_poa_e15833_Figure_2_figure_Supplement_1.pdf]

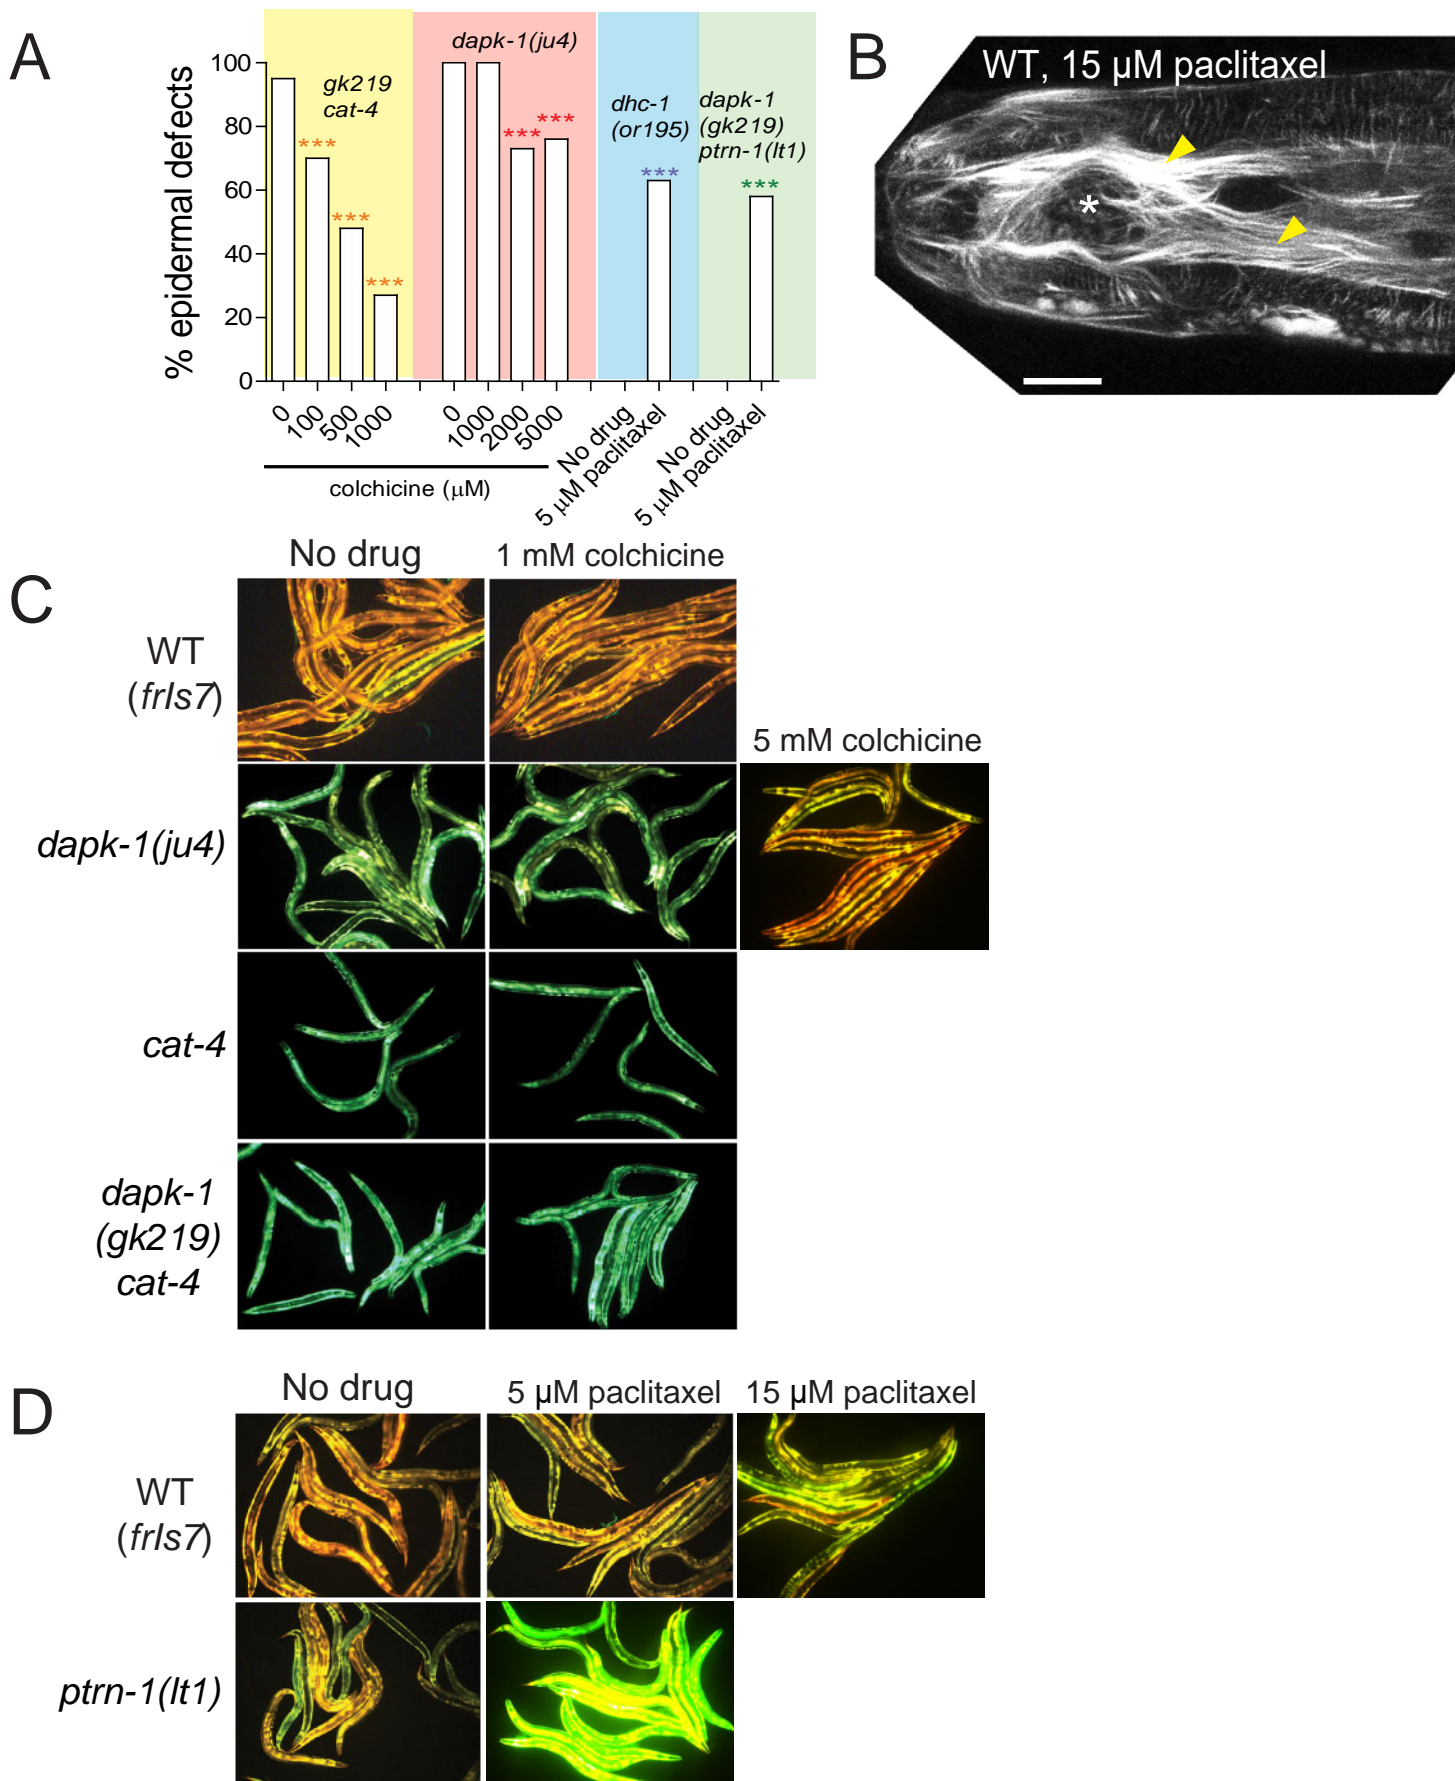

Figure 3--figure supplement 1

Supplement: supp [file elife_poa_e15833_Figure_3_figure_Supplement_1.pdf › elife_poa_e15833_Figure_3_figure_Supplement_1.pdf]

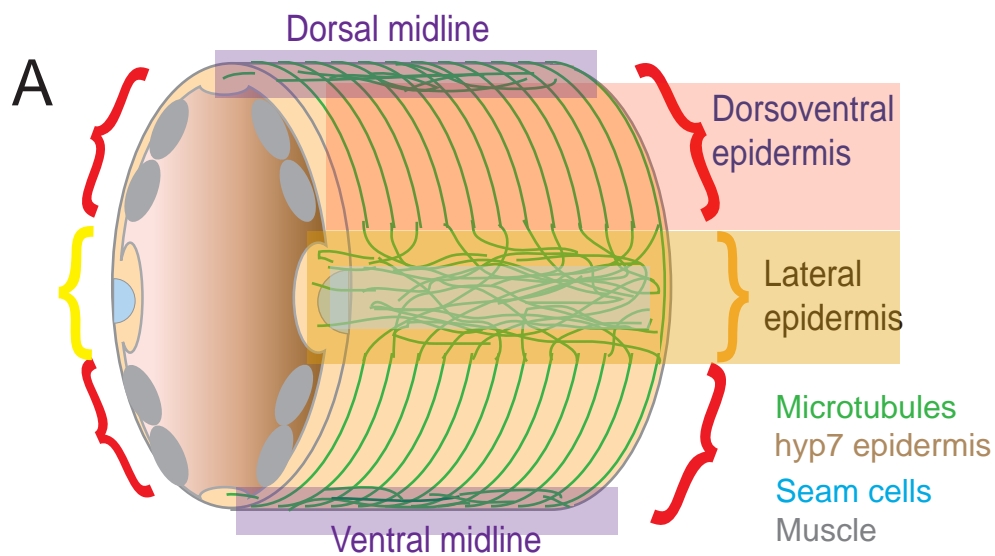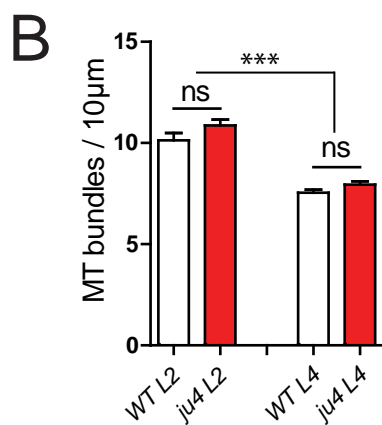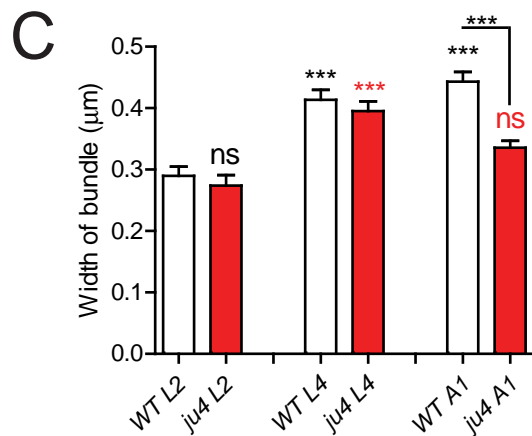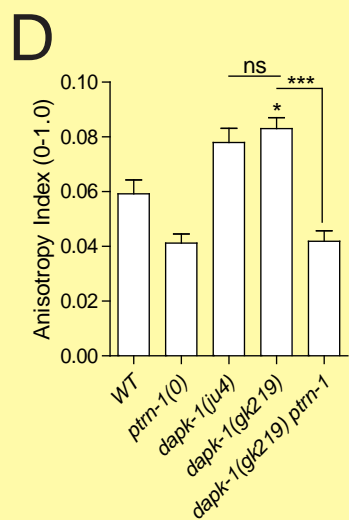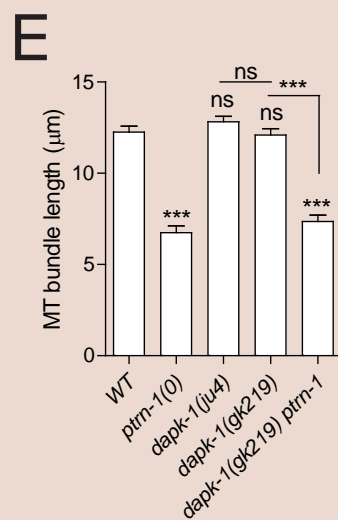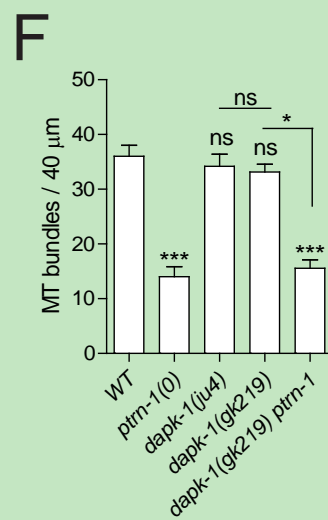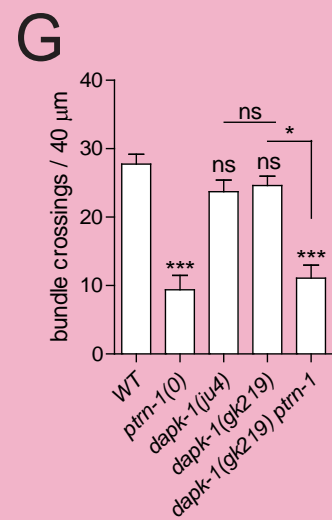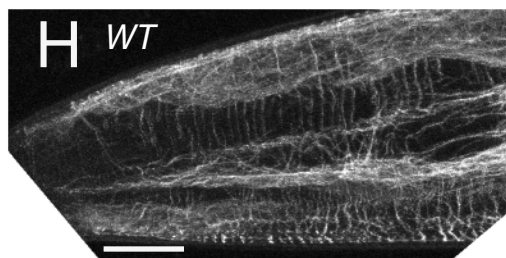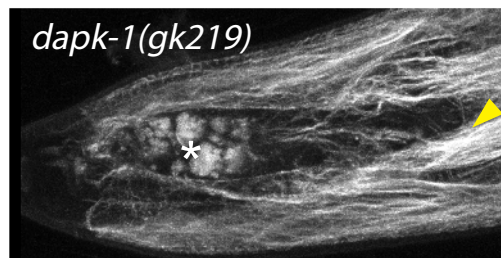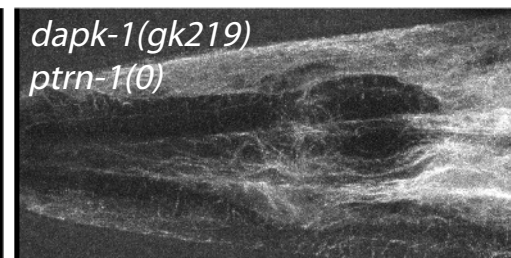

Figure 4--figure supplement 1

Supplement: supp [file elife_poa_e15833_Figure_4_figure_Supplement_1.pdf › elife_poa_e15833_Figure_4_figure_Supplement_1.pdf]

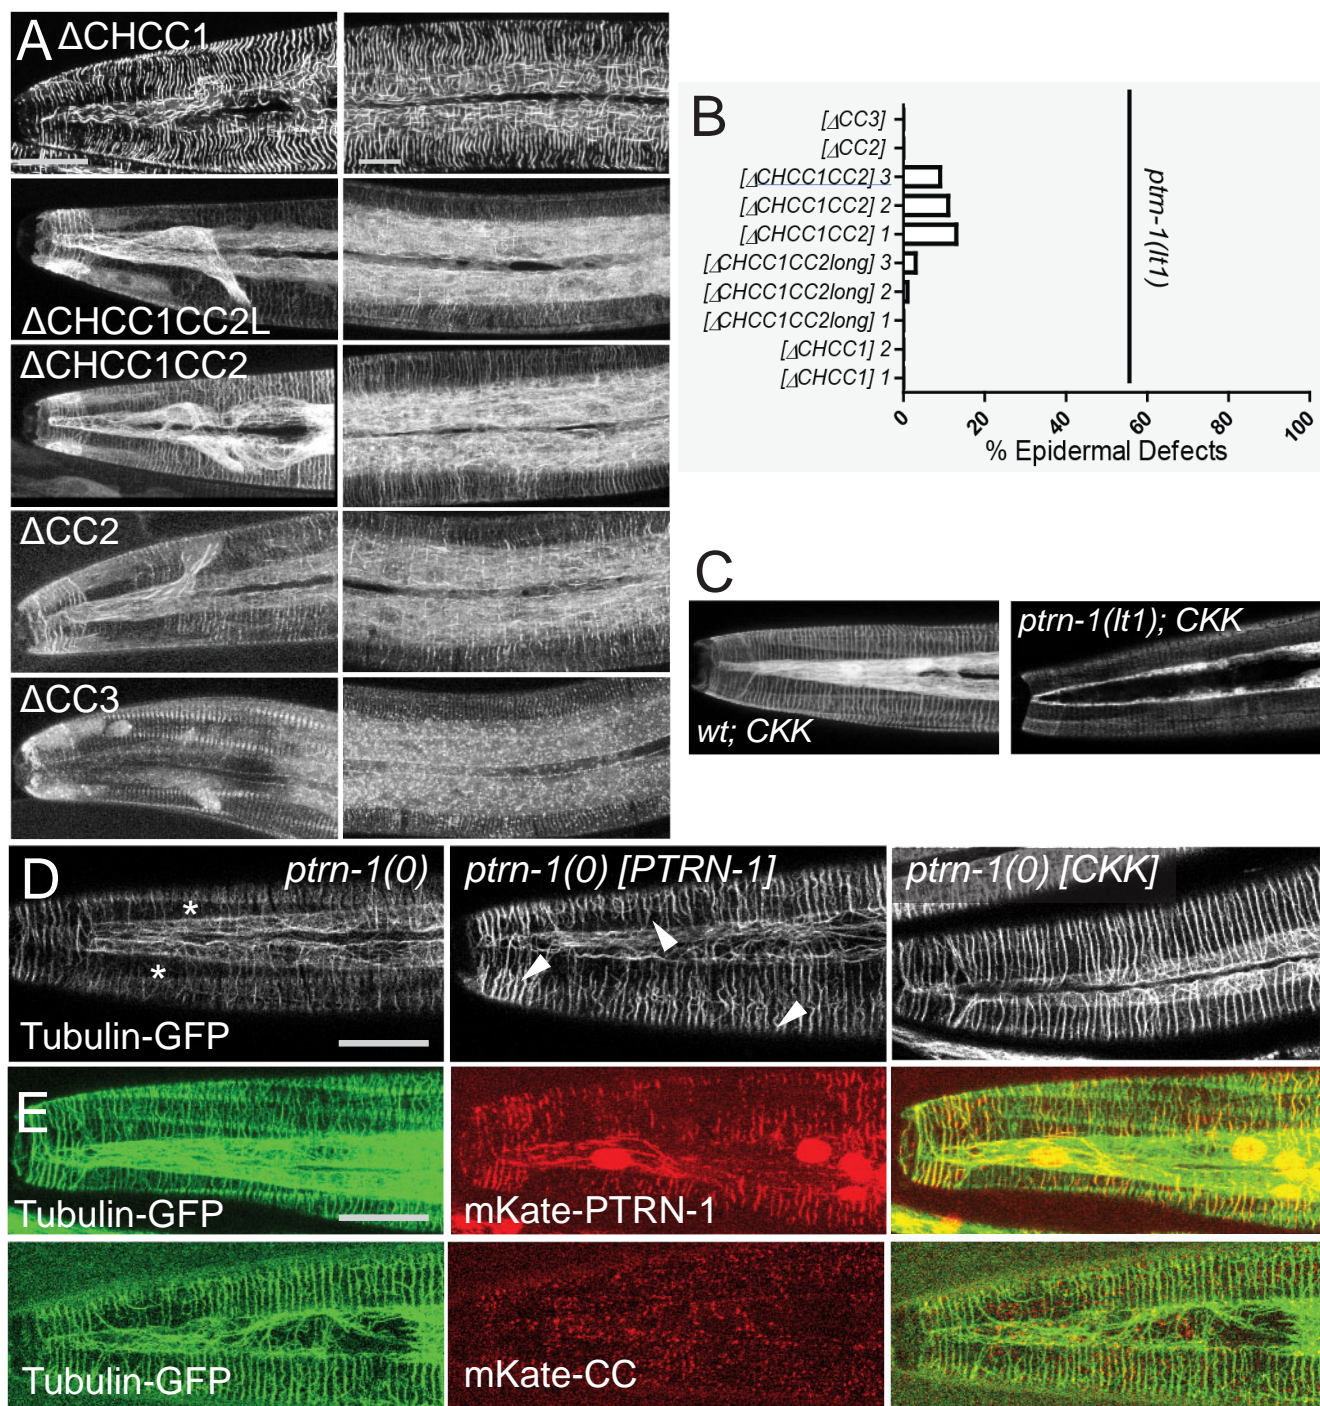

Figure 5--figure supplement 1

Supplement: supp [file elife_poa_e15833_Figure_5_figure_Supplement_1.pdf › elife_poa_e15833_Figure_5_figure_Supplement_1.pdf]

**A**

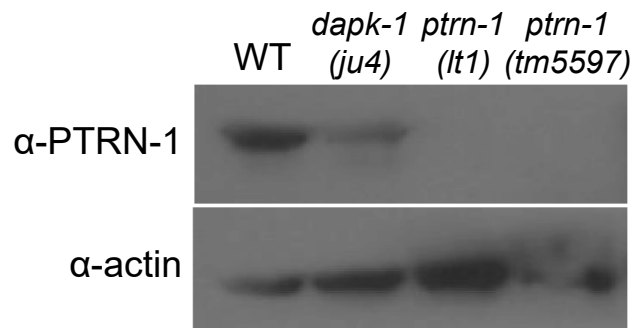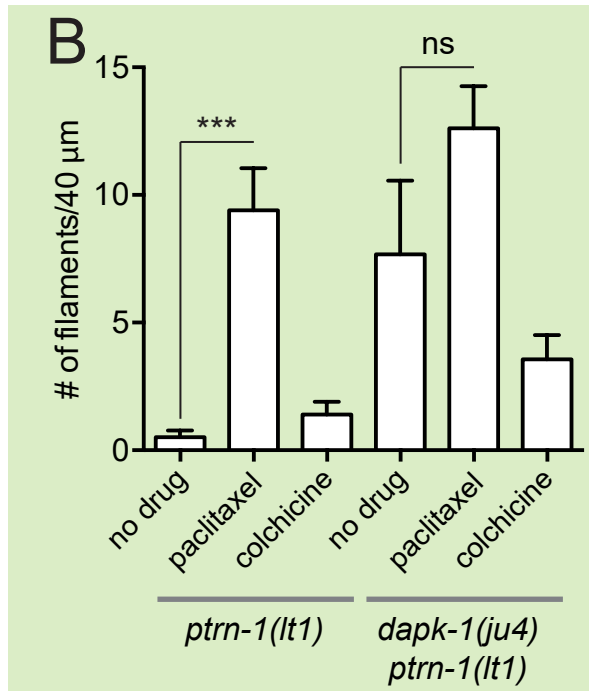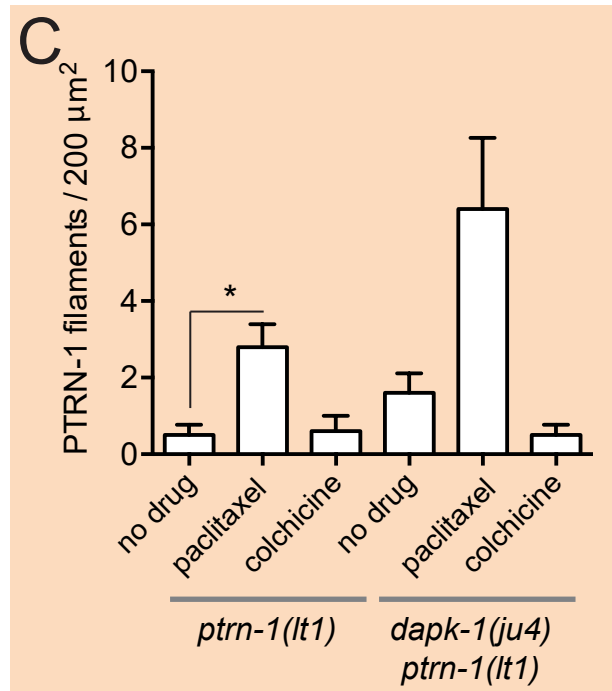

**D**

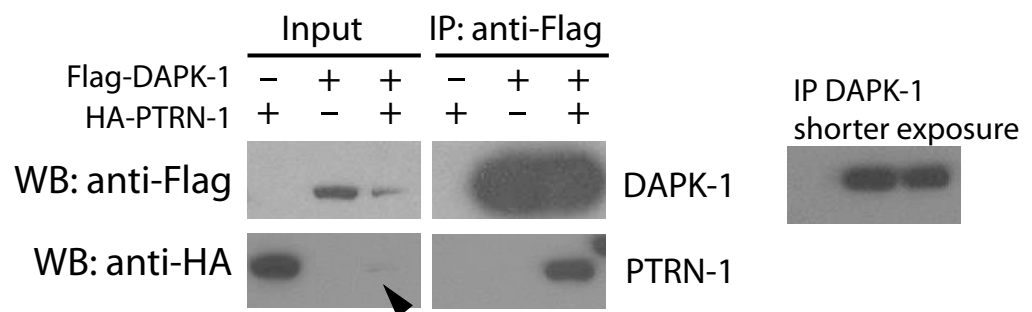

Figure 6--figure supplement 1

Supplement: supp [file elife_poa_e15833_Figure_6_figure_Supplement_1.pdf › elife_poa_e15833_Figure_6_figure_Supplement_1.pdf]

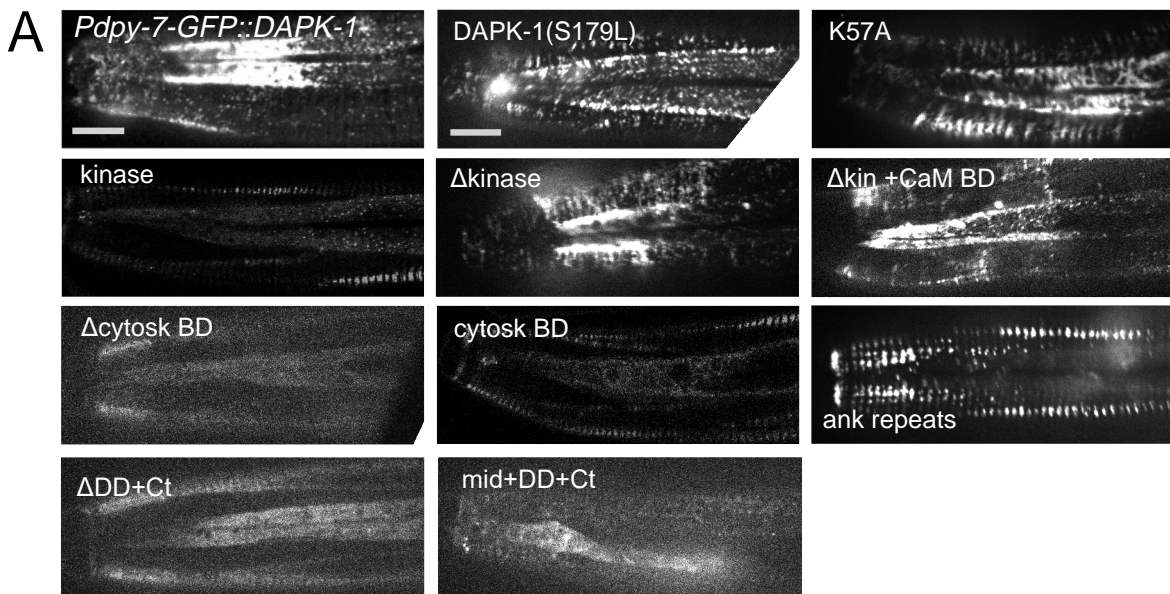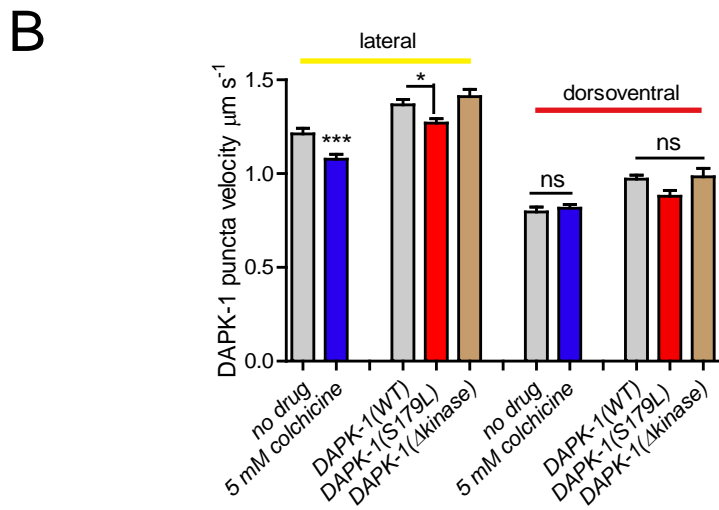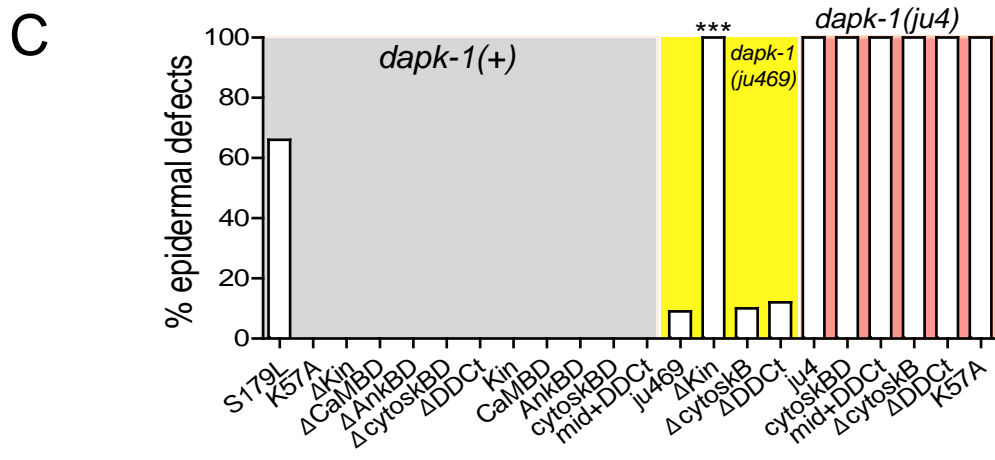

Figure 7--figure supplement 1

Supplement: supp [file elife_poa_e15833_Figure_7_figure_Supplement_1.pdf › elife_poa_e15833_Figure_7_figure_Supplement_1.pdf]
